# Supplementary material for: Automatic detection and correction of pitch misalignment in windturbine rotors
Source: Copernicus journal article supplement (doi:10.5194/wes-2018-23), 2018-04-03
Supplement: Supplementary file [file wes-2018-23-AC1-supplement.pdf]

## Reply to Reviewers

We thank the reviewers for their detailed analysis and constructive inputs. A list of point-by-point replies to the reviewers' comments is detailed in the following.

### Reviewer 1

- Reviewer:** *Page 1, Abstract, line 8, "A part from the availability..." do you mean "Apart from the availability..."?*

**Authors:** This was fixed.
- Reviewer:** *Page 3, Section 1, "somewhere in the introduction section, I am wondering how you can distinguish 1P loading due to yaw misalignment from 1P loading due to pitch calibration error? Do you need to assume the yaw misalignment is perfect? How would you address this? I am not sure if I saw this clearly explained in the paper."*

**Authors:** Yaw misalignment will cause 1P loading on the blade, but 3P loading in the fixed system. On the other hand, pitch misalignment will cause 1P loading in the fixed system. From this point of view, the two effects can be clearly distinguished. This is explained in section 2.1 of the paper.
- Reviewer:** *Page 10, section 3.2, somewhere in the Linearity section I thought of the issue of what about when the physical blades are not balanced (e.g. some sort of mass discrepancy due to a manufacturing tolerance issue)? Do you need to assume the blades are perfectly identical? I think this should be clarified somewhere in the paper.*

**Authors:** Please see reply 13 to reviewer 2.

### Reviewer 2

- Reviewer:** *The description of the state of art is incomplete. However it is clear that the introduction has to be short and precise and is not the core part of the work. So, it is up to the editor and authors how many changes are done.*

**Authors:** The additional references suggested by the reviewer were included in the bibliography, and the introduction modified accordingly.
- Reviewer:** *There is a patented load reduction system implemented by General Electrics in their turbines already for several years for blade angle misalignment determination and correction by temporarily changing the blade angles during operation (exact patent number currently unknown, sorry). The hub movement relative to the fixed frame is measured at  $4 \times 90^\circ$ , so it is not based on accelerometers. This patent should be mentioned, (at least in future papers) and discussed in how far the presented work does not interfere with this patent/ procedure/ algorithm, etc. If this point is covered already by one of the references of the paper please indicate this.*

**Authors:** Based on the reviewer's hint, we identified two patents from GE –of which we were not previously aware– on the topic of wind turbine rotor rebalancing: US 2009/0035136A1 and US 8,683,688 B2. It is true that even in the case of these patents, as in our paper, pitch angle changes are used to identify the source of the imbalance. However, none of the patents provides the mathematical formulation of the method, nor it demonstrates that rebalancing by pitch offsetting is a solvable and well-posed problem. In addition, measurements are assumed to be made on the

shaft, which is a significant difference with our method. In fact, our rebalancing algorithm can in principle be used with different sensors (strain-gauges, accelerometers, ...) located in different positions, without modifications to the algorithm itself. Furthermore, our formulation shows that one can rebalance a completely generic case characterized by multiple unbalanced blades. This problem is not even mentioned in the two patents. For completeness, the patents have been added to the bibliography and duly cited in the text.

3. **Reviewer:** *Consistency of definition of thrust: either call it shear or thrust force Section 2.1, p4, Fig 1: In the text above the thrust force  $t$  is introduced. However, fig. 1 contains the name changed to shear force. This has to be consistent. Page 5, 6, especially eq. 7 and 8: many symbols not contained in nomenclature, see last page.*

**Authors:** The legend of Figure 1 contained an error, and it should read “Thrust force  $t$  ...” instead of “Shear force  $t$  ...”. This was corrected. Other missing symbols have now been included in the nomenclature.

4. **Reviewer:** *Obtaining independence from operating point using dynamic pressure from nacelle anemometer Please short explanation why well-known non-linearities from tower resonance during imbalance measurements (e.g. Gasch/Twele “Wind Power Plants”, Springer 2005, chapter 8; VDI3834-1:2015) which affect the axial acceleration measurement and nacelle anemometer behaviour can be removed by normalizing the dynamic pressure. Please state for the simulation environment turbine rotor speed range and natural frequencies of tower simulated to show that resonance effects are. Many towers have (1st bending) resonance frequency within the operating range, resonance affects axial and lateral measurement. Lattice towers may have problems with resonance from torsional vibration.*

**Authors:** The text has been updated to address the points raised by the reviewer. In short, the method only uses 1P harmonics, which are typically separated from other frequencies. In addition, one can simply avoid performing the rebalancing at operating points characterized by resonances, since these are typically known with good accuracy.

In addition, a possible resonance between 1p and tower bending modes will produce fore-aft and side-side vibrations, with only limited effects on the pure yawing and nodding accelerations, which are mainly excited by the tower torsion mode at a higher frequency. By using the differential signal between two accelerometers suitably located in the nacelle, as described at the end of section 3.1, our implementation reduces the effects of fore-aft and side-side motions (affected by the resonance).

5. **Reviewer:** *It is well known that the nacelle anemometer cannot be trusted so much. It is affected by the rotor wake, its position on the nacelle etc. The calibration of the nacelle anemometer transfer function is a big point of discussion in the wind industry. WindGuard published a report in 2018 (“Anemometer calibration at different air temperatures and air pressures”, <https://www.windguard.com/publicationswind-energy-statistics.html>) detected significantly different anemometer behaviour under changing climatic conditions. Please explain nacelle anemometer position /measuring point during simulation. Why is it possible to neglect this? Or is it assumed that the turbine control has a very exact nacelle anemometer calibration, then this needs to be stated as requirement like the SNR of the acceleration sensor? These approaches need explanation or stricter requirement statements in the paper’s results/conclusions section.*

**Authors:** The reviewer is certainly right in pointing out the low accuracy of nacelle anemometers. Following the reviewer's suggestion, a sensitivity analysis was performed to study the effect of errors in the anemometer measurements, by assuming errors up to  $\pm 20\%$  in the wind speed estimates. The effects of such errors were always minimal, leading only to a slight increase in the number of required iterations. This was duly noted in the revised text. In addition, it should also be remarked that one could use a rotor-effective measurement of the wind speed, based for example on the torque-balance equation, this way by-passing the need of relying on the nacelle anemometer. This fact was also duly noted in the revised text, with the addition of a relevant reference.

**Reviewer:** *The equation of the dynamic pressure needs formatting and numbering like other equations, despite it is perhaps trivial for the authors. There should be the equation for normalisation of acceleration with the dynamic pressure and a related symbol introduced and used in fig. 3 etc. to prevent misunderstandings. The averaging interval of  $U_a$  is not mentioned.*

**Authors:** The equation has been numbered as requested, and the averaging interval of  $U_a$  has been clarified in the text.

**Reviewer:** *Figure 3 needs corrections: Physical property is "Scaled acceleration" which can be found in the text page 10, line 24-24 in a verbal description, and derived from the unit if it comes clear that  $U_s$  and metric units are mixed, US unit "g" for acceleration and kg in one single expression. Please use only SI units.*

**Authors:** The revised version of the paper now only uses SI units.

6. **Reviewer:** *Fig 3 should allow a plausibility check of performed simulation with field measurements (e.g. exemplary values given in the above mentioned papers) and show that the 1P-torsional amplitudes are in the right order of magnitude and the SNR of evaluation. There are no direct 1P-amplitudes given in fig. 3, only the sine and cosine component, hence the following estimation and comparison with the field is only valid if the way of estimation is correct. Estimating the acceleration backwards with the dynamic pressure from Fig. 3 gives e.g. for the sine component for blade 1 at  $-2^\circ$  approx. 26 mg. In the field, measured torsional amplitudes from acceleration are in the range below 3 mg for  $2^\circ$  blade angle deviation. For the fine-tuning range below  $0.5^\circ$  they are in the range below 0.5 mg, often below 0.1 mg. At this amplitude level, it is in the noisy measuring environment, especially close to the main bearing in the field very difficult to fulfil the required SNR of 22dB even for high quality sensors. Despite the shown linearity in Fig 3, there are some more questions whether the linearity can be really assumed as well in the field.*

**Authors:** Following the reviewer's input, we discovered an unfortunate mistake in the data reported in Figure 3: the magnitude of the "torsional" accelerations should be indeed about 0.9 mg at 7 m/s for a deviation of  $2^\circ$ . The figure was corrected accordingly, and such a mistake was only confined to the plot. Non-linearities can be corrected as discussed in the paper using the proposed method in an iterative fashion. Regarding SNR, please see reply no. 8.

7. **Reviewer:** *Is yawing excluded during the performed simulations? Then this is an additional requirement to be mentioned as well in the Conclusions. Is the axial displacement of the nacelle from thrust changes linked with wind speed changes considered during the simulations? Due to the coupling of axial, lateral and torsional vibration this is a very complex topic and may impact on the centre of the torsional vibration, i.e. disturbing the assumed linearity.*

**Authors:** The simulations were performed under different inflow conditions, and include different yaw misalignment angles, different upflows and vertical shears. Moreover, the aeroelastic model comprises about 2500 degrees of freedom, and includes all possible needed couplings. This was clarified in the text.

8. **Reviewer:** *The sensitivity studies are very good and extensive. However, the line for SNR5 should be shown in Fig. 8 because a SNR 5 to 10 dB is to be expected in the field, especially for the steps of refined blade angle correction because of various noise sources in the nacelle, especially close to a bearing.*

**Authors:** Additional results with lower values of SNR were added, and the text updated accordingly. It appears that results are fairly robust with respect to this parameter, and even modest values of SNR allow for a precise rebalancing of the rotor.

9. **Reviewer:** *It has to be corrected that the SNR requirement is for the entire measuring device including evaluation, not only for the sensors, see above. [...] Moreover, the guideline states requirements for measurements on low frequent turbine vibration measurements and that the measuring device including the evaluation has to meet the requirements, not only the sensor.*

**Authors:** This is correct, and the text was updated accordingly.

10. **Reviewer:** *The paper states the measurement can be performed during normal operation. Many modern turbines have several vibration control / torque control algorithms implemented. How would the proposed method be affected, or is it an additional requirement to be mentioned to turn all this off?*

**Authors:** This is a good point, although we think that the answer will depend on the specifics of the control algorithm. In any case, a comment in this sense was added to the text.

11. **Reviewer:** *Using order analysis requires a trigger to obtain the phase angle correctly, i.e. a rotor speed sensor. So not only the nacelle wind speed and accelerometers but such a signal is required.*

**Authors:** Correct, we assume that rotor speed and azimuth are available, and this is stated in the paper.

12. **Reviewer:** *Despite in the presented simulation the results for 10 min time intervals are consistent, it has to be kept in mind that VDI 3834-1:2015 recommends larger measurement intervals than 10 min for diagnostic measurements. However, as the method uses step by step measurements, the validation of the results is included.*

**Authors:** The 10-minute window was chosen as a compromise: short windows might not be able to eliminate turbulent effects, while using long windows one might encounter significant changes in operating conditions (e.g., wind speed, direction, etc.). The definition of best practices to be used in the field can only be addressed once the method is comprehensively tested on real turbines.

13. **Reviewer:** *Comment for future work: Will there be a sensitivity analysis of the impact of mass imbalance on the proposed method? It is known from the field statistics that at a rotor, mass imbalance and aerodynamic imbalance is often simultaneously present. Mass imbalance limits may be as small as 60 kgm while detected mass imbalances amount up to more than 5000 kgm*

*even today. Mass imbalance causes as well torsional vibration due to its lever to the center of torsional rotation and the fore-aft movement for the tilted rotor.*

**Authors:** We agree, and in addition there is a need to develop reliable ways of distinguishing these two effects. A note in this sense was added to the conclusions.

14. **Reviewer:** *Page 17: The Nomenclature is incomplete*

**Authors:** This has now been fixed.

We have taken the opportunity to make several small editorial changes to the text, in order to improve readability. A revised version of the manuscript is attached to the present reply, with the main changes highlighted in red.

Best regards.

The authors
